# Supplementary figures and images for: Effectiveness of Peer-Supported Computer-Based CBT for Depression Among Veterans in Primary Care
Source: Atypon-hosted journal article supplement (doi:10.1176/appi.ps.201900283), 2020-01-14

**Study CONSORT Diagram**

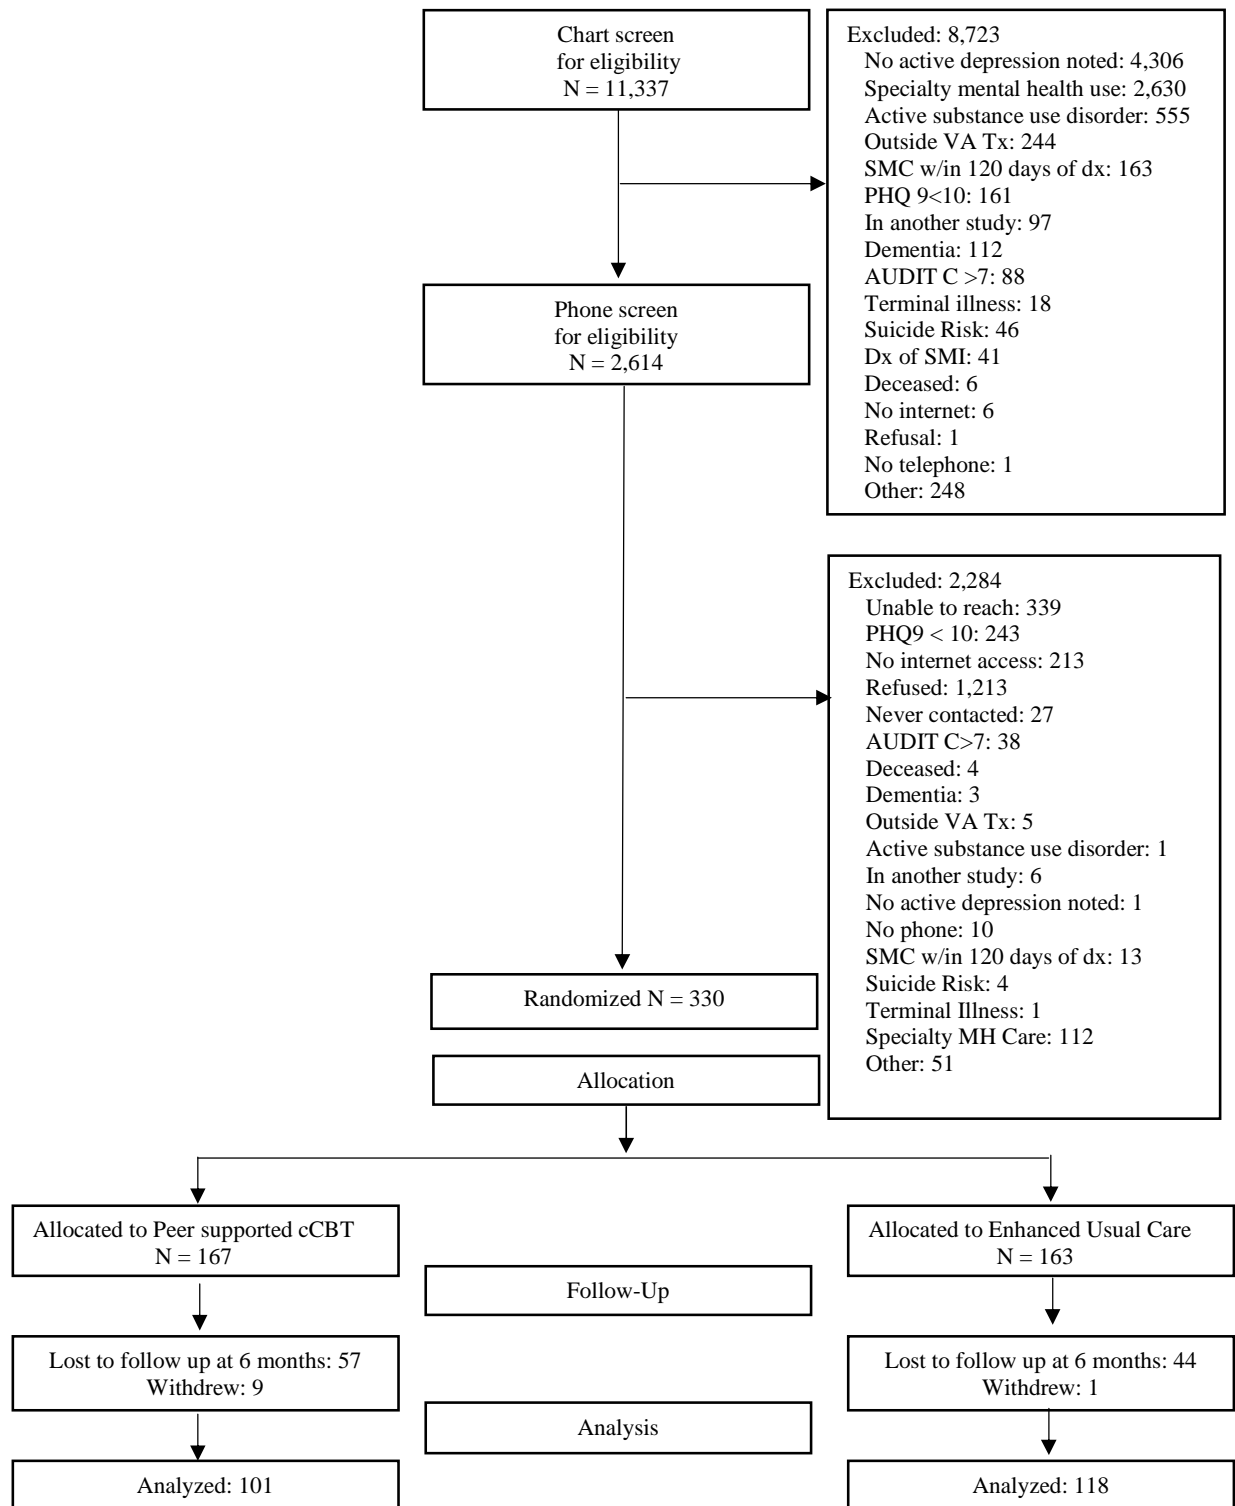

Supplement: appi.ps.201900283.ds001.pdf [file appi.ps.201900283.ds001.pdf]
